# Supplementary material for: Lysosomal Re-acidification Prevents Lysosphingolipid-Induced Lysosomal Impairment and Cellular Toxicity
Source: PLoS Biol. 2016 Dec 15;14(12):e1002583. doi: 10.1371/journal.pbio.1002583 (PMC5169359; doi:10.1371/journal.pbio.1002583)
Supplement: S1 Data — (XLSX) [file pbio.1002583.s001.xlsx]

## Sheet: FIg1
Fig1A		rel. survival (% 0uM Psy control)
	uM Psy	Oligo			CxN			HcN			OPC
		Rep1	Rep2	Rep3	Rep1	Rep2	Rep3	Rep1	Rep2	Rep3	Rep1	Rep2	Rep3
	1	92.34	95.82	98.34	97.91	105.32	104.85	103.5	95.98	103.5	93.0096	92.6475	95.7158
	3.3333	15.09	23.92	21.45	102.39	105.27	107.38	102.92	95.48	102.92	37.3796	41.1784	38.3223
	5	3.48	3.54	4.12	95.57	99.78	103.04	100.86	90.78	100.86	14.7991	14.1777	14.1121
	10	2.98	0.48	4.01	50.24	50.43	60.08	65.85	66.64	65.85	3.26091	2.06351	2.69622
	15	0.37	0.06	0.92	27.21	24.82	35.34	53.69	49.99	53.69	1.24909	2.78451	1.53963
	20	0.03	0	0	9.85	8.84	23.94	36.87	36.51	36.87	2.11907	1.25619	1.25263
	33.333	0	0.03	0	4.64	3.2	9.77	9.25	19.22	9.25	0	0	0
	50	0	0	0	1.52	0.93	5.56	3.81	9.25	3.81	0	0	0
	100	0	0	0	0.02	0	0.06	0.03	0.04	0.03	0	0	0
Fig1B		mean # cells/clone
		0uM Psy	1uM Psy
	Rep1	25.17	10.04
	Rep2	31.14	4.07
	Rep3	28	8
Fig1C		rel. lipid accumlation (fold change above untreated control)
		ctrl	propranolol	BafA	NH4Cl	CQN	Psy
	Rep1	1	5.3	9.34	9.49	9.16	3.83
	Rep2	1	7.52	12.45	12.57	15.75	4.66
	Rep3	1	5.74	4.14	4.57	6.97	3.92
	Rep4						4.6
	Rep5						5.54
	Rep6						2.63
Fig1D		rel. mean integrated fluor. intensity (% max intensity)										Time to half-max intensity
	time (min)	Ctrl				Psy						ctrl	psy
		Rep1	Rep2	Rep3	Rep4	Rep1	Rep2	Rep3	Rep4		Rep1	5.429	29.06
	0	0	0	0	0	0	0	0	0		Rep2	3.174	17.58
	2.5	46.93	53.34	49.65	40.68	27.08	25.14	20.42	20.43		Rep3	4.609	18.09
	5	53.88	59.73	49.76	50.93	38.54	39.65	24.82	27.59		Rep4	5.492	25.73
	7.5	59.47	70.09	58.21	55.98	28.79	33.68	43.25	44.22
	10	59.14	76.78	89.13	87.96	29.77	52.69	65.18	40.31
	15	62.43	75.96	57.7	52.65	42.51	42.43	39.23	34.54
	20	69.76	71.37	62.02	59.68	35.56	44.23	40.86	37.87
	25	90.48	107.84	69.51	64.46	37.88	52.2	42.37	32.81
	30	66.49	77.29	67.05	58.7	40.48	58.86	53.06	37.3
	35	74.61	81.07	130.87	134.32	57.72	68.31	44.4	49.24
	40	77.67	93.53	86.2	82.23	39.25	59.83	66.6	55.43
	45	82.1	94.73	86.85	74.59	48.84	64.26	59.43	49.06
	50	78.32	92.44	91.94	89.06	56.22	65.74	69.45	59.18
	55	140.38	109.18	90.08	105.44	65.72	57.3	93.47	79.5
	60	133.32	70.81	92.54	98.34	74.97	65.16	81.98	93.95
	65	87.63	102.88	82.26	81.37	58.42	68.27	79.88	79.95
	70	65.93	91.95	90.8	90.76	74.45	78.97	100.11	92.09
	75	79.34	89.23	104.86	102.25	81.08	85.07	74.49	55.1
	80	114.88	99.71	90.65	87.98	77.52	120.12	96.36	96.43
	85	88.23	124.6	117.82	108.97	89.61	101.36	72.84	57.84
Fig1E		rel. CathD activity (fold over control)					rel. CathDB activity (fold over control)
		ctrl	BafA	Psy			ctrl	BafA	Psy
	Rep1	1	3.8	4.43		Rep1	1	3.75	6.59
	Rep2	1	7.64	7.58		Rep2	1	6.86	14.71
	Rep3	1	3.19	4.12		Rep3	1	3.14	4.77
Fig1F		lysosomal pH 24h treatment							lyso pH 48h
		untr	BafA	CQN	NH4Cl	psy			unt 48h	psy 48h
	Rep1	4.89	5.52	6.1	5.36	5.54		Rep1	4.74	5.376
	Rep2	4.8	5.54	5.94	5.59	5.79		Rep2	4.93	5.508
	Rep3	4.95	5.58	5.75	5.67	5.54		Rep3	4.65	6.16

## Sheet: Fig2
Fig2B		rel. cell number (fold change from 0d)								rel. prolif. rate over 5d
	Elapsed	veh			psy					No Psy		+Psy
	Time (d)	Rep1	Rep2	Rep3	Rep1	Rep2	Rep3			mean	SD	mean	SD
	0	1	1	1	1	1	1			100	0	52.64	11.92
	0.99	2.25	2.16	0.84	1.23	1.35	1.38
	1.81	4.56	4.87	4.53	1.69	1.54	1.74
	3.11	11.37	11.27	11.21	3.52	3.57	2.88
	3.8	12.72	13.35	13.01	5.07	4.6	4.65
	5.07	14.91	14.07	14.14	6.56	6.94	7.73
	rel. prolif. rate over 5d	Drug#	57	161	34	811	811	122	116	825	161	740	355	181	161	60	57	103	169	151	812	154	196	815	204	735	91	91	37	42	181	110	170	729	93	179	91	169	778	23	816	143	202	25	345	77	120	122	132
		[Drug] uM	1	0.2	1	0.2	1	5	5	5	1	5	0.2	0.2	5	5	0.2	5	1	5	5	5	5	5	1	5	1	0.2	1	5	5	5	5	5	5	5	5	5	5	5	5	1	5	1	0.2	5	5	1	5
		rel. prolif. %	-44.7615	-39.8202	-38.6376	-34.676	-33.1544	-32.0453	-30.8067	-29.9451	-28.9426	-28.506	-28.412	-28.0417	-27.8316	-27.751	-27.3019	-27.0985	-27.0752	-26.6578	-24.9892	-24.1603	-24.0219	-23.9658	-22.8724	-22.6004	-22.5288	-22.4895	-22.4653	-22.1384	-22.0652	-21.8509	-21.1756	-20.9335	-20.6803	-20.6494	-19.7682	-19.7513	-19.7348	-19.7168	-19.3228	-18.4604	-18.2898	-18.0542	-17.9823	-17.9682	-17.8384	-17.5539	-17.2802
Fig2C		rel. prolif. Rate (% untreated control) (5d)											rel. prolif. Rate (% untreated control) (5d)
		ctrl	psy	1G05	2C11	2F10	2F11	2G03	2G06	2G08	4B07		ctrl	psy	5E11	6A11	6E10	7C04	8D08	9C06	9E07	10B02	11B08
	Rep1	100	49.31	76.96	53.8	92.47	93.11	60.55	49.02	104.51	57.58		100	50.22	54.94	80.71	126.58	83.36	112.53	61.37	82.57	103.04	27.5
	Rep2	100	21.18	64.97	67.3	98.2	95.53	79.33	63.86	116.9	70.69		100	31.64	65.14	79.64	148.26	103.87	115.93	81.94	69.1	116.05	44.51
	Rep3	100	22.06	57.57	38.85	88.63	90.05	57.79	49.59	102.24	60.94		100	55.47	68.86	65.31	122.19	83.45	94.35	61.1	78.01	95.88	53.02
	Rep4	100	47.96	111.28	86.1	49.11	103.42	88.7	76.48	106.79	79.75		100	65.43	78.55	68.75	102.5	84.16	97.05	80.67		94.2	66.76
	Rep5	100	63.25	104.02	82.35	55.99	106.48	79.95	91.15	104.85	85.08		100	27.74	34.73	73.25	114.83	76.31	106.59	49.43		94.57	11.01
	Rep6	100	26.38	59.93	54.82		91.24	48.6	30.74	85.17	28.69		100	7.44	28.62	91.4	168.75	99.31	127.46	42.55		124.68	19.93
	Rep7												100	26.26	18	80.91	141.17	59.1				119.69	21.21
Fig2D		rel. prolif. Rate (% untreated control) (5d)
		Ctrl	Psy	Psy+1G05	Psy+2F10	Psy+2F11	Psy+2G08	Psy+6E10	Psy+8D08	Psy+10B02	Psy+11C04	Psy+13D05
	Rep1	100	45.28	80.5	54.03	63.77	84.06	111.81	110.34	107.27	122.17	76.99
	Rep2	100	28.51	101.94	66.61	66.38	72.65	81.58	96.24	93.19	86.67	66.66
	Rep3	100	24.31	108.58	67.18	125.18	115.07	132.95	105.43	123.89	116.64	98.01
	Rep4	100	42.65	101.94	66.61	127.71	133.37	115.01	106.6	110.38	92.46	73.24
	Rep5	100	23.24	108.58	74.03	93.95	107.99	111.85	109.19	102.22	70.12	72.11
	Rep6	100	19.18	52.65	79.93	81.64	56.18	93.39	98.71	98.8	109.15	90.67
	Rep7	100	26.46	47.6	106.89	124.05	96.06	172.47	163.97	169.98	201.97	161.14
Fig2F		rel. survival (% untreated control) (5d)											rel. survival (% untreated control) (5d)
		ctrl	psy	1G05	5B10	8C02	8D08	9B10	9C06	9E07	12C08		Ctrl	Psy	IGF 10	IGF 33	IGF 100
	Rep1	100	36.66	87.39	87.87	78.78	89.27	69.23	81.86	69.87	71.16		100	55.38	72.63	94.47	98.03
	Rep2	100	57.42	83.11	89.06	78.77	87.65	77.89	81.22	78.4	70.85		100	50.51	73.93	94.05	98.05
	Rep3	100	65.82	78.02	89.94	80.36	85.67	77.52	80.86	80.39	71.28		100	57.57	82.77	93.39	96.21
Fig2G		rel. survival (% untreated control) (5d)
	uM Psy	-IGF			+IGF
		Rep1	Rep2	Rep3	Rep1	Rep2	Rep3
	0	100	100	100	99.28	105	102.6
	0.03333	100.57	99.08	98.58	98.61	108.96	103.06
	0.1	99.98	106.71	99.84	97.9	106.39	101.83
	0.333	99.83	99.63	97.8	99.35	108.1	102.47
	1	96.23	69.84	85.33	100.65	107.05	101.84
	3.3333	88.2	46.84	41.25	99.11	105.4	100.65
	5	21.38	5.4	23.18	94.99	92.2	97.94
	10	8.68	2.18	5.33	85.23	101.08	82.82
	15	7.95	0	4.02	65.27	76.83	65.77
	20	3.03	0	1.97	36.71	61.49	59.65
Fig2H		mean # cells/clone (5d)
		ctrl	psy	+IGF
	Rep1	25.17	10.04	30.161
	Rep2	31.14	4.07	40.397
	Rep3	28.43	8.1	39.984
Fig2I		rel. neutral lipid accumlation (fold over untreated control)						rel. phospholipid accumlation (fold over untreated control)
		Ctrl	Psy	Psy+IGF	Psy+8D08	Psy+9C06		Ctrl	Psy	Psy+IGF	Psy+8D08	Psy+9C06
	Rep1	1	8.78	0.9	3.37	3.48		1	4.6	1.8	2.5	2.64
	Rep2	1	3.82	1.47	3.39	2.9		1	5.54	1.17	2.66	2.37
	Rep3	1	3.32	1.23	2.15	2.2		1	4.66	0.69	1.74	1.85
Fig2J		rel. CathD activity (fold ovre untreated control)
		ctrl	BafA	Psy	Psy+IGF	Psy+8D08	Psy+9C06		ctrl	BafA	Psy	Psy+IGF	Psy+8D08	Psy+9C06
	Rep1	1	3.8	4.43	0.9	0.82	1.13		1	3.75	6.59	5.26	7.19	6.91
	Rep2	1	7.64	7.58	1.28	0.69	0.75		1	6.86	14.71	6.05	13.8	11.18
	Rep3	1	3.19	4.12	1.34	1.19	0.54		1	3.14	4.77	1.7	4.7	4.87
Fig2K		time to half-maximal intensity (min)
		ctrl	Psy	Psy+IGF	Psy+8D08	Psy+9C06
	Rep1	5.429	29.06	7.76	15.94	18.57
	Rep2	3.174	17.58	6.958	12.94	5.329
	Rep3	4.609	18.09	7.907	4.954	6.316
	Rep4	5.492	25.73	6.061	4.865	7.451
Fig2L		lysosomal pH
		unt	Psy	Psy+8D08	Psy+9C06	Psy+IGF	Psy+NT3	Psy+1E04	Psy+5F05	Psy+9A06	Psy+9H10
	Rep1	4.89	5.54	5.39	4.97	5.07	5.87	5.46	5.45	5.39	5.55
	Rep2	4.8	5.79	4.63	5.15	5.01	5.66	5.48	5.34	5.53	5.55
	Rep3	4.95	5.54	4.43	5.05	4.43	5.44	5.52	5.31	5.53	5.55
[truncated: 3,073 more columns]

## Sheet: Fig3
Fig3A		rel. prolif. Rate (% untreated control) (5d)
					FTI-276	GGTI-298	GW-5074	L-779450	Wort	Akt-I	U0126	SP-600125	Rapa	NPC-15437	ICI-182780	KT-5720	H89	PKI(14-22)	ODQ	PKG-I
		ctrl	Psy	Psy+1G05	Psy+1G05	Psy+1G05	Psy+1G05	Psy+1G05	Psy+1G05	Psy+1G05	Psy+1G05	Psy+1G05	Psy+1G05	Psy+1G05	Psy+1G05	Psy+1G05	Psy+1G05	Psy+1G05	Psy+1G05	Psy+1G05
	Rep1	1	0.3159	0.8601	0.7624	0.2888	0.6272	0.5731	0.6997	0.4499	0.4704	1.0028	0.811	0.4852	0.4465	0.4768	0.3565	0.8732	0.8759	1.1232
	Rep2	1	0.4931	0.8332	0.7813	0.1885	0.3504	0.7933	0.6837	0.3145	0.2129	0.939	0.8201	0.5847	0.0915	0.266	0.1286	0.7951	0.9449	1.0593
	Rep3	1	0.3767	0.8767	0.4431	-0.5101	0.3964	0.0145	0.4069	0.2106	0.4318	0.5797	0.8058	0.5661	0.4704	0.4129	0.5252	0.9128	1.0456	1.0865
Fig3B		rel. prolif. Rate (% of Psy+1G05 sample) (5d)
			FTI-276	GGTI-298	GW-5074	L-779450	Wort	Akt-I	U0126	SP-600125	Rapa	NPC-15437	ICI-182780	KT-5720	H89	PKI(14-22)	ODQ	PKG-I
		Psy+1G05	Psy+1G05	Psy+1G05	Psy+1G05	Psy+1G05	Psy+1G05	Psy+1G05	Psy+1G05	Psy+1G05	Psy+1G05	Psy+1G05	Psy+1G05	Psy+1G05	Psy+1G05	Psy+1G05	Psy+1G05	Psy+1G05
	Rep1	1	0.820421	-0.0498685	0.571959	0.472581	0.70526	0.246255	0.283902	1.26224	0.909866	0.311123	0.239945	0.295598	0.0746682	1.02402	1.02898	1.48346
	Rep2	1	0.847443	-0.895826	-0.419827	0.882815	0.560313	-0.525234	-0.824025	1.31112	0.961556	0.269297	-1.18119	-0.668066	-1.07192	0.887991	1.32848	1.66502
	Rep3	1	0.1329	-1.77369	0.0394745	-0.724474	0.0604733	-0.332068	0.110291	0.406102	0.858366	0.378792	0.187438	0.0724814	0.297019	1.07231	1.3379	1.4197
Fig3C		mean rel. prolif. Rate (% of Psy+Drug sample for each drug) (5d)
	Drug	FTI	GGTI	GW	L779	Wort	Akti	U0126	SP600	Rapa	NPC	ICI	KT	H89	ODQ	PKGi
	1G05	0.8469	0.492516	0.711619	0.908533	0.744408	0.446007	0.526805	0.489865	0.981381	0.725637	0.339836	0.387013	0.50094	0.779772	0.69872
	2C11	0.762492	-0.257347	0.288548	0.261836	0.40782	0.141585	-0.634002	0.592853	0.515652	0.493953	-0.875555	-0.362696	-0.428905	0.805052	0.285924
	2F10	0.748553	-0.0392697	0.609559	0.539096	0.487692	0.344711	-0.0133942	0.658705	0.638213	0.424578	0.0610829	-0.180323	-0.497649	0.845338	0.552118
	2F11	0.777256	0.253205	0.579726	0.69839	0.596172	0.459457	0.279674	0.732415	0.852036	0.477099	0.110005	0.228755	0.13816	0.886962	1.25976
	2G08	0.801609	0.145468	0.540527	0.479472	0.548426	0.475395	0.0801945	0.84957	0.783565	0.530682	0.19279	0.14492	-0.101012	0.901637	1.45189
	6F10	0.704533	0.352045	0.572442	0.421658	0.619495	0.471493	0.119726	0.9387	0.915598	0.783293	-0.0363783	0.257841	-0.174686	1.0615	0.677009
	8D08	0.899682	0.0934865	0.623051	0.701901	0.539089	0.48255	0.203163	0.871145	0.889662	0.650987	0.216848	0.228843	0.0733615	1.02393	1.52714
	13D05	0.751479	0.231172	0.629766	0.634156	0.637015	0.422579	0.192437	0.772833	0.731689	0.348963	-0.00265109	0.0932588	-0.141072	0.965054	0.853807
	13H03	0.787777	-0.0652881	0.617166	0.438362	0.495015	0.473802	-0.0602815	1.06656	0.983099	0.590917	0.121494	0.0122005	0.024324	1.05	1.54838
	7C04	0.404856	-0.461324	-0.134485	0.444833	-0.238968	0.098564	-0.978468	0.841307	-0.600057	0.171922	0.231653	-0.00465775	0.451754	1.45047	1.2089
	10B02	0.837594	0.86272	0.559939	0.734751	0.630091	0.812933	-0.148704	0.71667	0.571159	0.663674	-0.112608	0.584855	0.346805	1.12881	1.30696
	11C04	0.867328	0.892727	0.730915	0.706538	0.581464	0.599722	0.163631	1.00858	0.577812	0.955992	0.0265458	0.576827	0.555075	1.22055	1.29014

## Sheet: Fig4
Fig4A		lysosomal pH
		Unt	Psy	Psy+cAMP	Psy+FSK
	Rep1	4.89	5.54	5.11	5.15
	Rep2	4.8	5.79	5.24	5.09
	Rep3	4.95	5.54	5.06	5.3
Fig4B		rel. prolif rate (% control) (5d)
		ctrl	Psy	Psy+cAMP
	Rep1	100	32.72	83.04
	Rep2	100	41.56	132.97
	Rep3	100	45.55	116.87
	Rep4	100	39.99	113.77
Fig4C		lysosomal pH
		ctrl	RP107	CFTRi	psy	psy + RP107	psy + RP + CFTRi
	Rep1	4.89	5.03	5.12	5.54	5.14	5.47
	Rep2	4.8	4.93	5.08	5.79	5.11	5.99
	Rep3	4.95	5.16	4.83	5.54	5.06	5.65
Fig4D		rel. prolif rate (% untreated control) (5d)
		ctrl	RP107	CFTRi	Psy	Psy+RP	Psy+RP +CFTRi
	Rep1	4.89	5.03	5.12	5.54	5.14	5.47
	Rep2	4.8	4.93	5.08	5.79	5.11	5.99
	Rep3	4.95	5.16	4.83	5.54	5.06	5.65
Fig4E		rel. phosholipid accumulation (fold change over untreated)						rel. neutral lipid accumulation (fold change over untreated)
		Unt	Psy	RP107	Psy+RP	Psy+RP +CFTRi		Unt	Psy	RP107	Psy+RP	Psy+RP +CFTRi
	Rep1	1	3.83	0.87	1.29	1.28		1	4.38	1.49	0.66	5.45
	Rep2	1	4.66	1.28	1.02	1.97		1	6.21	1.47	2.94	5.28
	Rep3	1	3.92	1.05	1.16	2.08		1	5.55	1.68	1.62	5.92
Fig4F		lysosomal pH
		Unt	Psy	H89	Psy+cAMP	Psy+cAMP +H89	Psy+9C06	Psy+9C06 +H89	Psy+IGF	Psy+IGF +H89	Psy+8D08	Psy+8D08 +H89
	Rep1	4.89	5.54	5.03	5.11	5.23	4.97	5.48	5.07	5.19	5.39	5.28
	Rep2	4.8	5.79	5.22	5.24	5.54	5.15	5.35	5.01	5.24	4.63	5.37
	Rep3	4.95	5.54	5.27	5.06	5.32	5.05	5.29	4.43	5.1	4.43	5.34
Fig4G		rel. prolif rate (% of untreated control) (5d)
		ctrl	KT	H89	psy	Psy+9C06	Psy+9C06 +KT	Psy+9C06 +H89	Psy+8D08	Psy+8D08 +KT	Psy+8D08 +H89	Psy+IGF	Psy+IGF +KT	Psy+9IGF +H89
	Rep1	100	110.02	106.81	48.38	76.83	32.62	64.51	107.63	64.39	50.71	90.26	19.04	25.47
	Rep2	100	101.38	97.95	33.42	82.34	64.36	49.05	126.78	76.71	56.52	106.96	52.31	40.03
	Rep3	100	100.68	96.39	45.58	97.53	79.33	83.87	111.22	39.96	34.51	102.34	72.17	68.12
	Rep4	100	115.34	110.8	43.78	104.56	68.42	68.96	109.11	73.66	61.7	89.63	29.72	42.28

## Sheet: Fig5
Fig5B		rel. survival (% untreated control) (5d)
	uM lipid	Psy			N-AcPsy
		Rep1	Rep2	Rep3	Rep1	Rep2	Rep3
	0.333	101.13	100.549	99.2714	101.12	100.89	100.27
	1	93.0096	92.6475	95.7158	99.81	101.14	99.49
	3.33	37.3796	41.1784	38.3223	100.28	101.42	99.14
	5	14.7991	14.1777	14.1121	100.6	102.23	99.84
	10	3.26091	2.06351	2.69622	101.06	103.5	102.06
	15	1.24909	2.78451	1.53963	66.16	74.57	87.04
Fig5C		rel. # cells/clone (% control) (5d)
		ctrl	Psy	N-AcPsy
	Rep1	100	39.89	125.8
	Rep2	100	13.07	91.62
	Rep3	100	28.57	92.29
Fig5D		rel. neutral lipid accumulation (fold over ctrl)				rel. phospholipid accumulation (fold over ctrl)
		ctrl	Psy	N-AcPsy		ctrl	Psy	N-AcPsy
	Rep1	1	8.78	4.52		1	4.6	0.92
	Rep2	1	3.82	1.28		1	5.54	0.61
	Rep3	1	8.84	1		1	4.66	1.77
Fig5E		time to half-max intensity (min)
		ctrl	Psy	N-AcPsy
	Rep1	5.429	29.06	4.199
	Rep2	3.174	17.58	5.782
	Rep3	4.609	18.09	4.081
	Rep4	5.492	25.73	3.931
Fig5F		rel. CathD activity (% untreated control)				rel. CathB activity (% untreated control)
		ctrl	Psy	N-AcPsy		ctrl	Psy	N-AcPsy
	Rep1	100	311.22	103.16		100	529.67	179.38
	Rep2	100	186.57	128.88		100	280.29	89.91
	Rep3	100	248.79	94.86		100	625.44	224.51
	Rep4	100	309.23	62.58		100	488.06	167.44
Fig5G		lysosomal pH
		ctrl	Psy	N-AcPsy
	Rep1	4.89	5.54	5.09
	Rep2	4.8	5.79	5.01
	Rep3	4.95	5.54	4.21

## Sheet: Fig6
Fig6B		rel. survival (% untreated control) (5d)
	uM lipid	Psy			GlcSph			Lyso-SF			LacSph			N-AcPsy			GluCer			N-AcSF			LacCer
		Rep1	Rep2	Rep3	Rep1	Rep2	Rep3	Rep1	Rep2	Rep3	Rep1	Rep2	Rep3	Rep1	Rep2	Rep3	Rep1	Rep2	Rep3	Rep1	Rep2	Rep3	Rep1	Rep2	Rep3
	0.333	101.13	100.549	99.2714	98.52	98.62	100.4	99.31	97.64	94.9	101.14	102.74	100.53	101.12	100.89	100.27	100.03	101.42	103.92	101.11	101.34	100.88	99.95	100.52	100.19
	1	93.0096	92.6475	95.7158	99.83	97.78	99.42	93.52	93.82	90.21	97.84	99.62	100.14	99.81	101.14	99.49	101.15	100.77	102.11	101.64	101.94	100.71	97.81	98.44	96.48
	3.33	37.3796	41.1784	38.3223	32.98	38.32	40.13	25.56	20.62	19.21	90.31	86.92	89.18	100.28	101.42	99.14	102.02	101.69	101.27	102.63	102.32	102.01	97.85	95.3	97.29
	5	14.7991	14.1777	14.1121	15.06	13.77	20.72	14.08	16.63	8.48	91.31	88.99	89.01	100.6	102.23	99.84				103.64	103.53	102.99	99.28	97.51	94.91
	10	3.26091	2.06351	2.69622	9.4	8.59	14.95	10.2	7.92	9.08	86.75	86.35	87	101.06	103.5	102.06	97.82	98.77	99.08	97.09	96.11	95.87	97.47	98.34	96.95
	15	1.24909	2.78451	1.53963	5.39	4.39	6.53	2.64	9.33	3.29	39.24	50.67	47.8	66.16	74.57	87.04				81.45	82.65	80.56	96.75	95.95	95.81
	20	2.11907	1.25619	1.25263	6.67	11	7.26	5.65	2.07	7.18	35.81	37.74	29.39							18.41	17.65	29.92	97.48	96.21	95.75
Fig6C		rel. # cells/clone (rel. to untreated controls for each lipid) (5d)
		-Psy	+Psy	-N-AcPsy	+N-AcPsy	-GlcSph	+GlcSph	-GlcCer	+GlcCer	-lyso-SF	+lyso-SF	-N-AcSF	+N-AcSF	-LacSph	+LacSph	-LacCer	+LacCer
	Rep1	100	39.89	100	125.8	100	42.29	100	112.97	100	26.35	100	103.4	100	31.63	100	87.83
	Rep2	100	13.07	100	91.62	100	72.92	100	78.24	100	51.97	100	95.21	100	22.24	100	112.81
	Rep3	100	28.57	100	92.29	100	45.02	100	72.28	100	38.05	100	112.4	100	21.51	100	86.24
Fig6D		rel. neutral lipid accumulation (fold change over untreated control)										rel. phospholipid accumulation (fold change over untreated control)
		ctrl	N-AcPsy	GlcCer	N-AcSF	LacCer	Psy	GlcSph	LSF	LacSph		ctrl	N-AcPsy	GlcCer	N-AcSF	LacCer	Psy	GlcSph	LSF	LacSph
	Rep1	1	4.52	1.2	1.11	0.87	8.78	5.02	1.92	3		1	0.92	1.03	1.39	1.01	4.6	2.11	3.46	6.19
	Rep2	1	1.28	0.98	4.84	1.39	3.82	8.47	9.1	2.41		1	0.61	1	1.95	0.56	5.54	3.36	4.1	2.27
	Rep3	1	1	0.76	2.56	2.97	3.32	4.87	2.95	4.82		1	1.77	1.24	2.95	1.01	4.66	1.65	3.16	4.25
	Rep4	1			1.56	2.04	8.84		2.05	5.08
Fig6E		time to half-max intensity (min)
		ctrl	Psy	GlcSph	Lyso-SF	LacSph	N-AcPsy	GlcCer	N-AcSF	LacCer
	Rep1	5.429	29.06	16.22	14.34	13.36	4.199	4.483	3.735	6.387
	Rep2	3.174	17.58	14.89	16.31	28.45	5.782	5.666	3.527	5.477
	Rep3	4.609	18.09	19.96	10.59	34.2	4.081	4.667	7.617	3.024
	Rep4	5.492	25.73	33.09		30.53	3.931	6.133	8.198	3.113
Fig6F		rel. CathD activity (% untreated control)										rel. CathB activity (% untreated control)
		ctrl	Psy	GlcSph	Lyso-SF	LacSph	N-AcPsy	GlcCer	N-AcSF	LacCer		ctrl	Psy	GlcSph	Lyso-SF	LacSph	N-AcPsy	GlcCer	N-AcSF	LacCer
	Rep1	100	311.22	121.96	255.3	167.86	103.16	60.65	94.83	110.72		100	529.67	267.22	402.18	366.76	179.38	64.9	150.34	356.02
	Rep2	100	186.57	234.45	209.44	152.61	128.88	128.66	66.47	145.15		100	280.29	335.51	336.72	437.94	89.91	52.98	163.93	425.18
	Rep3	100	248.79	450.26	197.54	187.68	94.86	53.7	49.86	138.95		100	625.44	800.74	417.51	659.89	224.51	83.18	233.17	100.36
	Rep4	100	309.23				62.58	118.42	119.71	129.01		100	488.06	609.95	402.52	547.7	167.44	110.86	213.5	115.88
Fig6G		lysosomal pH
		ctrl	Psy	GlcSph	Lyso-SF	LacSph	N-AcPsy	GlcCer	N-AcSF	LacCer
	Rep1	4.89	5.54	5.25	5.47	5.53	5.09	4.68	5.18	5.3
	Rep2	4.8	5.79	5.44	5.57	5.45	5.01	4.39	5.2	4.8
	Rep3	4.95	5.54	5.54	5.45	5.53	4.21	4.31	5.16	4.17

## Sheet: Fig7
Fig7B		rel. neutral lipid accumulation (fold change over control)						rel. neutral lipid accumulation (fold change over control)						rel. neutral lipid accumulation (fold change over control)
		ctrl	GlcSph	GlcSph+IGF	GlcSph+ 8D08	GlcSph+ 9C06		ctrl	Lyso-SF	Lyso-SF+IGF	Lyso-SF+ 8D08	Lyso-SF+ 9C06		ctrl	LacSph	LacSph+IGF	LacSph+ 8D08	LacSph+ 9C06
	Rep1	1	4.17	4.25	2.66	3.09		1	1.92	0.63	0.74	1.17		1	3	0.2	1.02	1.4
	Rep2	1	4.45	1.23	2.1	3.17		1	9.1	1.2	3.63	0.96		1	2.41	0.29	0.41	0.78
	Rep3	1	5.04	1.84	5.63	5.15		1	2.05	0.42	1.08	2.52		1	4.82	1	0.84	3.29
	Rep4	1	20.4		6.07	9.11		1	2.95		0.54	0.63		1	5.08	0.62	0.31	0.84
		rel. phosholipid accumulation (fold change over control)						rel. phosholipid accumulation (fold change over control)						rel. phosholipid accumulation (fold change over control)
		ctrl	GlcSph	GlcSph+IGF	GlcSph+ 8D08	GlcSph+ 9C06		ctrl	Lyso-SF	Lyso-SF+IGF	Lyso-SF+ 8D08	Lyso-SF+ 9C06		ctrl	LacSph	LacSph+IGF	LacSph+ 8D08	LacSph+ 9C06
	Rep1	1	2.11	1.84	2.31	3.74		1	3.46	2.61	3.35	3.5		1	6.19	2.15	1.15	4.96
	Rep2	1	3.36	2.43	3.94	4.2		1	4.1	1.91	2.72	3.51		1	2.27	0.65	2.66	2.29
	Rep3	1	1.65	0.97	2.05	1.93		1	3.16	2.45	3.08	4.19		1	4.25	0.45	1.14	1.02
Fig7C		time to half-maximal intensity (min)						time to half-maximal intensity (min)						time to half-maximal intensity (min)
		ctrl	GlcSph	GlcSph+ IGF	GlcSph+ 8D08	GlcSph+ 9C06		ctrl	Lyso-SF	Lyso-SF+ IGF	Lyso-SF+ 8D08	Lyso-SF+ 9C06		ctrl	LacSph	LacSph+ IGF	LacSph+ 8D08	LacSph+ 9C06
	Rep1	5.429	16.22	5.106	5.924	6.092		5.429	14.34	10.04	10.12	2.443		5.429	13.36	12.98	9.787	3.915
	Rep2	3.174	14.89	12.25	6.699	6.667		3.174	16.31	11.43	6.94	3.221		3.174	28.45	6.342	15.35	5.329
	Rep3	4.609	19.96	3.809	14.61	10.31		4.609	10.59	3.488	9.612	7.988		4.609	34.2	9.877	5.726	11.43
	Rep4	5.492	33.09	5.062	14.12	14.05		5.492		2.416		6.498		5.492	30.53	8.087	9.722	16.99
Fig7D		rel. CathD activity (% untreated control)						rel. CathD activity (% untreated control)						rel. CathD activity (% untreated control)
		ctrl	GlcSph	GlcSph+ IGF	GlcSph+ 8D08	GlcSph+ 9C06		ctrl	Lyso-SF	Lyso-SF+ IGF	Lyso-SF+ 8D08	Lyso-SF+ 9C06		ctrl	LacSph	LacSph+ IGF	LacSph+ 8D08	LacSph+ 9C06
	Rep1	100	121.96	136.81	114.7	171.78		100	255.3	131.19	110.72	117.68		100	167.86	121.28	135.15	188.66
	Rep2	100	234.45	42.33	59.94	91.6		100	209.44	167.86	145.15	152.6		100	152.61	37.41	162.21	390.19
	Rep3	100	450.26	156.71	104.95	176.19		100	197.54	42.15	103.72	165.07		100	187.68	51.12	125.41	282.31
	Rep4	100		108.34	90.16	112.31
		rel. CathB activity (% untreated control)						rel. CathB activity (% untreated control)						rel. CathB activity (% untreated control)
		ctrl	GlcSph	GlcSph+ IGF	GlcSph+ 8D08	GlcSph+ 9C06		ctrl	Lyso-SF	Lyso-SF+ IGF	Lyso-SF+ 8D08	Lyso-SF+ 9C06		ctrl	LacSph	LacSph+ IGF	LacSph+ 8D08	LacSph+ 9C06
	Rep1	100	267.22	406.1	310.38	337.96		100	402.18	366.76	356.02	380.2		100	366.76	252.31	178.84	272.94
	Rep2	100	335.51	359.94	327.39	498.59		100	336.72	437.94	425.18	480.9		100	437.94	423.37	546.24	447.39
	Rep3	100	800.74	226.69	299.64	299.48		100	417.51	127.74	194.44	205.54		100	659.89	527.87	801.86	747.5
	Rep4	100	609.95	301.14	203.05	346.29		100	402.52	73.08	157.66	199.71		100	547.7	421.36	470.84	492.37
Fig7E		lysosomal pH						lysosomal pH						lysosomal pH
		ctrl	GlcSph	GlcSph+ IGF	GlcSph+ 8D08	GlcSph+ 9C06		ctrl	Lyso-SF	Lyso-SF+ IGF	Lyso-SF+ 8D08	Lyso-SF+ 9C06		ctrl	LacSph	LacSph+ IGF	LacSph+ 8D08	LacSph+ 9C06
	Rep1	4.89	5.25	4.73	4.85	4.92		4.89	5.47	4.87	4.79	4.59		4.89	5.53	5.09	5.07	4.73
	Rep2	4.8	5.44	4.71	4.79	4.94		4.8	5.57	4.88	4.73	4.61		4.8	5.45	4.95	4.97	4.82
	Rep3	4.95	5.54	4.61	4.89	4.95		4.95	5.45	4.97	4.76	4.67		4.95	5.53	5.03	4.97	4.95

## Sheet: Fig8
Fig8A		rel. survival (% untreated control) (5d)
	uM lipid	Psy			N-AcPsy			GlcSph			GlcCer			lyso-SF			N-AcSF			LacSph			LacCer
		Rep1	Rep2	Rep3	Rep1	Rep2	Rep3	Rep1	Rep2	Rep3	Rep1	Rep2	Rep3	Rep1	Rep2	Rep3	Rep1	Rep2	Rep3	Rep1	Rep2	Rep3	Rep1	Rep2	Rep3
	0.1	100.89	100.76	100.97	100.87	101.29	101	100.87	101.34	100.75	99.72	101.06	100.23	100.74	101.23	101.34	100.88	100.93	100.81	100.77	100.71	100.94	99.42	100.16	99.38
	0.333	100.76	100.39	100.63	101.32	100.78	101.04	100.55	100.84	100.42	101.21	100.93	100.57	100.77	100.58	100.93	100.48	100.91	101.12	100.43	100.15	100.3	99.94	99.69	100.13
	1	94.03	95.01	90.07	101.16	100.96	101.13	93.37	82.09	81.04	101.19	101.02	99.89	88.48	90.69	86.3	100.63	100.94	101.31	100.48	100.22	99.93	99.16	99.19	99.31
	3.33	19.83	21.2	21.73	95.45	95.52	94.46	23.78	19.15	22.05	100.77	101.11	100.76	40.91	44.29	37.15	101.14	101.23	101.4	100.71	100.5	99.79	99.59	99.19	99.32
	5	15.56	11.9	8.77	100.42	100.65	99.71	14.86	13.46	11.1	100.84	101.19	100.57	35.62	33.4	31.75	100.84	101.05	100.8	99.57	99.99	99.79	99.95	98.38	99.41
	10	7.23	5.59	6.04	97.12	96.98	61.01	7.98	8.27	11.7	100.94	101	100.31	23.31	26.57	21	100.59	100.75	99.83	84.46	97.17	97.79	100.04	99.54	99.7
	15	2.43	2.16	1.12	55.99	56.07	32.23	3.72	4.35	5.29	101.21	101.04	100.21	22.27	19.05	19.32	98.99	97.61	95.88	19.07	50.88	53.17	100.26	98.92	99.54
	20	0.4	0.27	0.2	27.3	21.69	5.13	1.63	1.65	1.93	100.87	100.96	100.18	24.57	17.18	11.91	93.01	89.57	59.73	13.95	16.52	18.96	100	98.9	98.78
	33.33	0	0	0	23.76	3.88	2.99	0.25	0.44	1.68	100.88	101.22	97.86	0	1.24	0	10.5	8.36	5.25	1.35	4.13	11.32	98.73	98.47	98.72
Fig8B		rel. # of cells/clone (% untreated controls for each lipid) (5d)
		-Psy	+Psy	-N-AcPsy	+N-AcPsy	-GlcSph	+GlcSph	-GlcCer	+GlcCer	-lyso-SF	+lyso-SF	-N-AcSF	+N-AcSF	-LacSph	+LacSph	-LacCer	+LacCer
	Rep1	100	50.71	100	96.22	100	46.45	100	120.36	100	45.13	100	119.36	100	41.65	100	116.05
	Rep2	100	59.55	100	97.2	100	23.6	100	98.85	100	37.14	100	100.8	100	75.5	100	106.68
	Rep3	100	48.22	100	93.2	100	24.76	100	94.02	100	29.23	100	98.43	100	82.71	100	122.72
Fig8C		lysosomal pH
		Unt	BafA	Psy	GlcSph	Lyso-SF	LacSph	N-AcPsy	GlcCer	N-AcSF	LacCer
	Rep1	4.95	5.78	5.59	5.58	5.63	5.09	4.61	4.37	4.91	5.18
	Rep2	4.15	5.79	5.43	5.54	5.59	5.07	4.58	5.23	5.2	4.43
	Rep3	5.31	5.54	5.56	5.65	5.69	5.47	4.42	4.58	5.22	4.91
	Rep4	5.04			5.83	5.52	5.4		5.36	5.1	5.12
	Rep5	5.18			5.57		5.4
Fig8D		rel. prolif rate (% untreated control) (5d)
		ctrl	psy	Psy+1G05	Psy+2C11	Psy+2F10	Psy+2F11	Psy+2G08	Psy+6A11	Psy+6E10	Psy+7C04	Psy+8D08	Psy+9C06	Psy+9E07	Psy+10B02	Psy+11C04	Psy+11H07	Psy+13D05	Psy+13H03	Psy+IGF
	Rep1	100	54.16	85.45	58.81	47.6	63.76	58.3	58.02	50.31	52.68	90.11	110.69	46.54	59.54	87.46	54.4	70.93	63.04	82.27
	Rep2	100	52.59	61.47	49.28	43.88	44.74	33.1	46.57	45.39	52.28	73.83	82.21	39.73	64.96	65.9	56.76	68.04	57.75	66.93
	Rep3	100	45.79	92.96	85.16	57.5	63.66	53.74	81.01	76	53.75	85.91	85.45	56.75	77.46	75.15	62.57	72.07	60.69	102.82
Fig8E		lysosomal pH
		ctrl	Psy	Psy+IGF	Psy+8D08	Psy+9C06
	Rep1	5.38	5.82	5.15	5.35	5.33
	Rep2	5.12	5.6	5.22	5.43	5.48
	Rep3	5.25	5.47	5.61	5.51	5.48

## Sheet: Fig9
Fig9A	rel. fluoromyelin intensity (%WT)
		WT+veh	Twi+veh
	Rep1	71.92	36.46
	Rep2	105.56	42.96
	Rep3	122.52	47.22
Fig9B	rel. # GSTpi+ OLs (%WT)
		WT+veh	Twi+veh
	Rep1	98.58	71.85
	Rep2	100.46	62.47
	Rep3	100.96	83.26
Fig9C	rel. # Ki67+ OPCs (%WT)
		WT+veh	Twi+veh
	Rep1	109.71	42.86
	Rep2	97.38	49.44
	Rep3	92.92	45.42
Fig9D		# of clones with 0 or 1 OPC (% of total clones)
		WT no OPC	Twi no OPC	WT 1 OPC	Twi 1 OPC
	Rep1	36.47	65.63	57.65	27.08
	Rep2	37.93	49.45	62.07	43.96
	Rep3	50	55	45.71	41.25
Fig9E	rel. # Ki67+ OPCs (%WT)
		WT+veh	Twi+veh
	Rep1	107.42	75.09
	Rep2	104.98	81
	Rep3	87.6	72.31
Fig9F		lysosomal pH
		WT	Twi
	Mouse-1	4.498	5.61
	Mouse-2	4.563	5.62
	Mouse-3	4.535	5.31
Fig9H		lysosomal pH
		WT+veh	Twi+veh	Twi+NKH
	Mouse-1	5.08	5.78	5.37
	Mouse-2	5.24	5.72	5.31
	Mouse-3	5.18	5.54	5.41
	Mouse-4	5.25
Fig9I		#Ki67+ OPCs (%WT)
		WT+veh	Twi+veh	Twi+NKH
	Rep1	109	37.17	79.2
	Rep2	97.34	74.06	68.76
	Rep3	93.66	24.82	94.05
Fig9K		rel. fluoromyelin intensity (%WT)
		WT+veh	Twi+veh	Twi+NKH
	Rep1	71.92	36.46	64.57
	Rep2	105.56	42.96	110
	Rep3	122.52	47.22	69.06
Fig9L		rel. # GSTpi+ OLs (%WT)
		WT+veh	Twi+veh	Twi+NKH
	Rep1	98.58	71.85	95.27
	Rep2	100.46	62.47	73.08
	Rep3	100.96	83.26	88.89
Fig9M	death events (1) for K-M curve				median survival
	age (d)	Twi+veh	Twi+NKH		Veh	NKH
	35	1			41	49
	41	1
	41	1
	41	1
	44	1
	44
	44
	45		1
	45
	46
	46		1
	46
	46
	48		1
	48		1
	50		1
	50		1
	50		1
	50		1
Fig9N		speed (cm/s)
		WT+veh	Twi+veh	Twi+NKH
	Mouse-1	29.623	8.507	12.039
	Mouse-2	30.328	5.529	14.775
	Mouse-3	31.835	5.279	10.367
	Mouse-4			11.195
Fig9O		front stance time (ms)				rear stance time (ms)
		WT+veh	Twi+veh	Twi+NKH		WT+veh	Twi+veh	Twi+NKH
	Mouse-1	70.97	152.82	109.67		86.38	169.37	110.19
	Mouse-2	67.82	194.18	100.56		88.02	226.21	152.23
	Mouse-3	67.16	130.32	63.48		73.5	149.27	59.7
	Mouse-4	69.46	155.66	109.64		84.96	135.73	81.62
	Mouse-5	70.9	231.79	104.92		78.65	104.23	250.14
	Mouse-6	61.47	192.82	127.92		80.09	179.65	162.48
	Mouse-7			66.33				83
	Mouse-8			104.82				172.45
Fig9P		beam traverse time (s)
		WT+veh	Twi+veh	Twi+NKH
	Mouse-1	2.4	14.1	5
	Mouse-2	6.8	11	16
	Mouse-3	11	53	9
	Mouse-4	9	14	13
	Mouse-5	14	12	16
	Mouse-6		6	9
	Mouse-7			14
	Mouse-8			8
		rel. weights (% of P15 weight)
Fig9Q	Age (d)	Twi+veh				Twi+NKH
		Mouse-1	Mouse-2	Mouse-3	Mouse-4	Mouse-1	Mouse-2	Mouse-3	Mouse-4	Mouse-5	Mouse-6	Mouse-7	Mouse-8
	15	100	100	100	100	100	100	100	100	100	100	100	100
	16	98.59	98.53	101.56	101.25	100.78	98.51	97.43	105.75	105.71	102.18	103.38	102.64
	17	100	98.53	100	100	102.96	100	95.71	107.61	107.82	105.58	107.49	104.46
	18	101.41	101.47	96.88	98.75	102.34	102.99	97.57	109.2	112.78	104.76	107.2	107.26
	19	104.23	104.41	100	100	104.84	102.99	100.14	112.07	117.29	106.94	107.2	104.62
	20	108.45	110.29	101.56	102.5	110.92	107.46	104.29	116.38	124.81	110.2	110.13	112.21
	21	112.68	111.76	103.13	106.25	120.9	108.96	111.43	122.13	133.98	112.93	113.07	117.16
	22	121.13	116.18	104.69	112.5	131.98	117.91	116.14	119.25	138.35	116.19	118.5	122.11
	23	123.94	119.12	110.94	117.5	138.69	123.88	122.57	123.56	145.56	121.63	121.88	127.06
	24	130.99	127.94	117.19	126.25	139.31	123.88	131.14	130.17	147.82	127.89	124.82	133.66
	25	132.39	127.94	121.88	133.75	149.14	134.33	133.71	125.72	151.28	137.41	131.86	141.09
	26	135.21	132.35	125	138.75	156.47	138.81	135.43	125.29	153.38	141.5	135.24	145.54
	27	139.44	135.29	131.25	147.5	159.13	143.28	147.71	126.44	156.39	145.85	136.42	151.82
	28	136.62	136.76	134.38	151.25	161.93	138.81	146.43	126.44	160.3	148.98	138.33	155.94
	29	133.8	132.35	132.81	151.25	170.05	147.76	149.43	125.57	160.9	144.22	133.63	151.82
	30	135.21	139.71	132.81	151.25	171.61	146.27	148	123.56	159.4	153.74	140.97	161.72
	31	129.58	133.82	132.81	151.25	168.49	149.25	147.14	122.13	160.9	155.1	135.1	171.62
	32	135.21	133.82	129.69	151.25	171.61	150.75	147.14	127.87	159.85	157.82	135.1	178.22
	33	133.8	129.41	131.25	152.5	168.49	149.25	147.14	127.01	156.39	154.42	133.63	174.26
	34	130.99	129.41	131.25	151.25	172.07	149.25	148.57	126.44	154.89	153.74	134.07	174.92
	35	126.76	130.88	129.69	150	171.61	147.76	148.57	125	151.88	153.74	135.1	171.62
	36	126.76	129.41	129.69	150	168.49	147.76	145.71	120.69	148.87	150.2	136.56	171.62
	37	115.49	122.06	126.56	135	168.49	144.78	141.57	119.25	146.47	148.3	136.56	173.27
	38	114.08	119.12	121.88	138.75	162.25	141.79	138.57	117.82	142.86	145.58	133.63	171.62
Fig9R		Brain Psy (pmol/[PO4])
		WT+veh	Twi+veh	Twi+NKH
	Mouse-1	0.00027	0.25751	0.51815
	Mouse-2	0.00819	0.55596	0.41186
	Mouse-3	0.00852	0.21976	0.21462

## Sheet: FigS1
FigS1A		# GalC+ Ols (% of total)
		0uM Psy		1uM Psy
		%GalC+	%A2B5+	%GalC+	%A2B5+
	Rep1	38.9734	61.0266	12.9129	87.0871
	Rep2	35.7013	64.2987	27.9817	72.0183
	Rep3	27.4016	72.5984	19.0476	80.9524
FigS1C		cell migration distance
			10ng/mL PDGF
		0ng/mL P	0uM Psy	1uM Psy
	Drop-1	35	591	272
	Drop-2	13	548	251
	Drop-3	14	537	337
	Drop-4	57	580	353
	Drop-5	33	484.413	246.398
	Drop-6	12	464.017	284.063
	Drop-7	21	540.133	208
	Drop-8	18.248	332.024
FigS1F		lysosomal pH
		ctrl	Psy	BafA
	Rep1	4.62	5.73	5.93
	Rep2	4.51	5.2	6.01
	Rep3	4.51	5.29	5.83

[truncated: 6 more sheets: FigS2, FigS3, FigS4, FigS5, FigS6, FigS7]
